# Supplementary material for: Comparison of the Duhamel Procedure and Transanal Endorectal Pull-through Procedure in the Treatment of Children with Hirschsprung’s Disease: A Systematic Review
Source: MDPI journal article supplement (doi:10.3390/jcm12206632), 2023-10-20
Supplement: s1 [file s1]

## A Sensitivity analysis of operation time

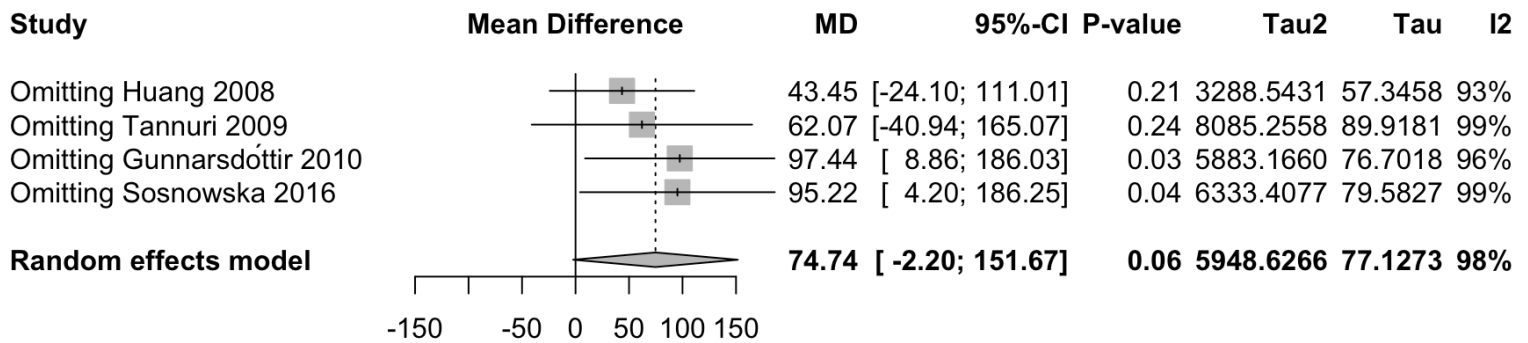

## B Operation time (omitting Gunnarsdóttir 2010)

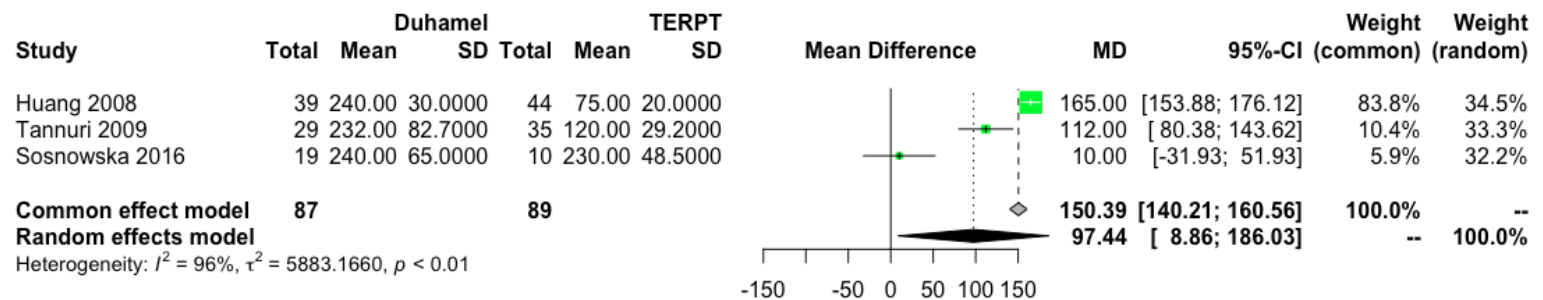

## C Operation time (omitting Sosnowska 2016)

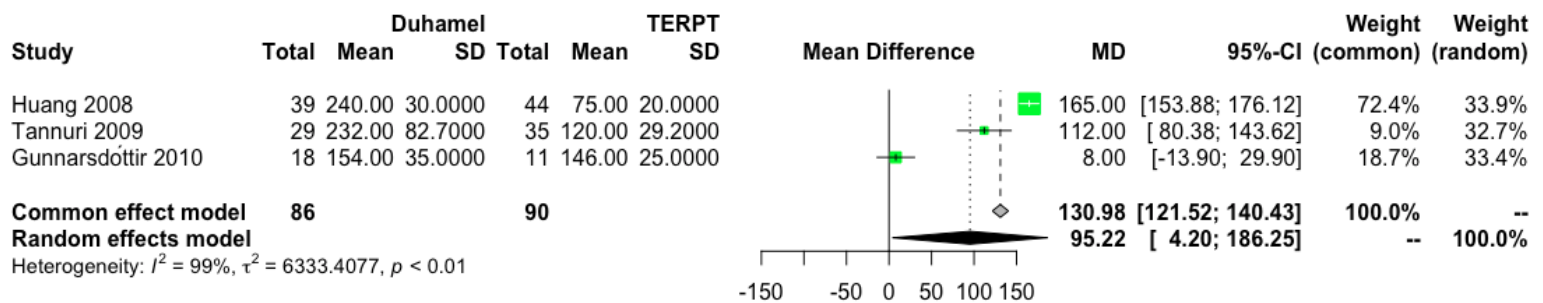

**Figure S1** Forest plot of sensitivity analysis of operation time data. After omitting the data from Gunnarsdóttir et al. or Sosnowska et al., the meta-analysis results would indicated that the operation time was longer in patients treated with the Duhamel procedure than in those treated with the TERPT procedure (WMD = 97.44 min, 95% CI = 8.86 to 186.03, P = 0.0311 and WMD = 95.22 min, 95% CI = 4.20 to 186.25, P = 0.0403, respectively) [17,19,20,22].

**Sensitivity analysis of postoperative enterocolitis**

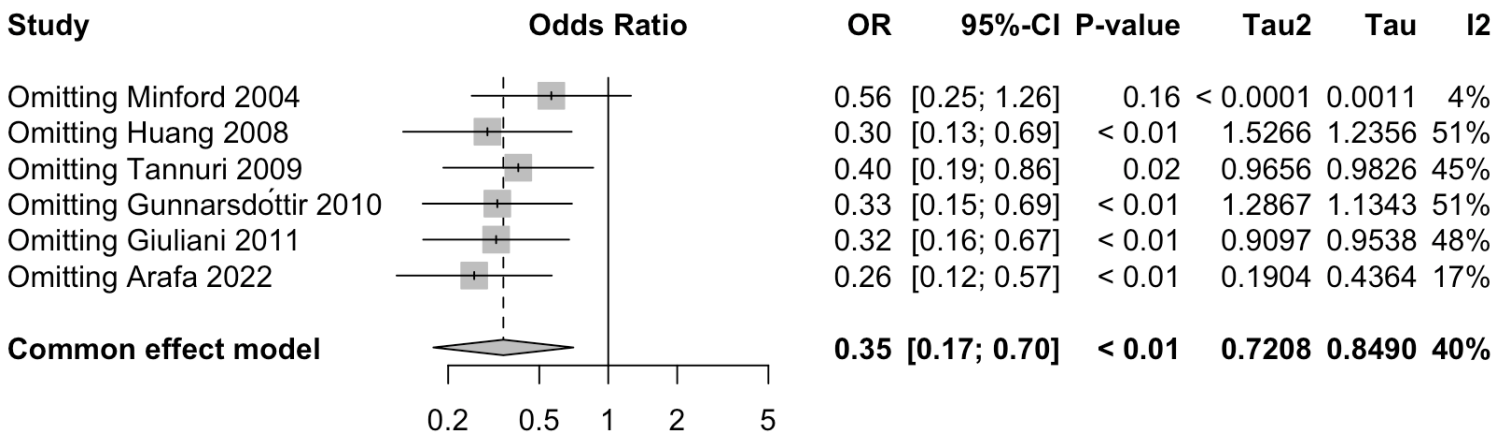

**Figure S2** Forest plot of sensitivity analysis of postoperative enterocolitis data [15,17,19–21,24].
